# Supplementary material for: The ST22 chronology for the Skytrain Ice Rise ice core – Part 1: A stratigraphic chronology of the last 2000 years
Source: Copernicus journal article supplement (doi:10.5194/cp-18-1831-2022), 2022-08-10
Supplement: Supplementary file 1 [file cp-18-1831-2022-supplement.zip]

Archive with 2 entries (2 files):
- cp-18-1831-2022-supplement-title-page.pdf
- alc_Skytrain_220131.xlsx
