# Supplementary material for: The ST22 chronology for the Skytrain Ice Rise ice core – Part 1: A stratigraphic chronology of the last 2000 years
Source: Copernicus journal article supplement (doi:10.5194/cp-18-1831-2022), 2022-08-10
Supplement: Supplementary file 1 [file cp-18-1831-2022-supplement.zip › cp-18-1831-2022-supplement-title-page.pdf]

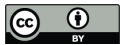

## *Supplement of*

# **The ST22 chronology for the Skytrain Ice Rise ice core – Part 1: A stratigraphic chronology of the last 2000 years**

**Helene M. Hoffmann et al.**

*Correspondence to:* Helene M. Hoffmann (hmh52@cam.ac.uk)

- cp-18-1831-2022-supplement-title-page.pdf
- alc\_Skytrain\_220131.xlsx

The copyright of individual parts of the supplement might differ from the article licence.
